# Supplementary material for: Genetic Markers for Western Corn Rootworm Resistance to Bt Toxin
Source: PubMed Central journal article supplement (PMC4349093; doi:10.1534/g3.114.016485), 2015-01-07
Supplement: supp_g3.114.016485_FigureS1.pdf [file supp_g3.114.016485_FigureS1.pdf]

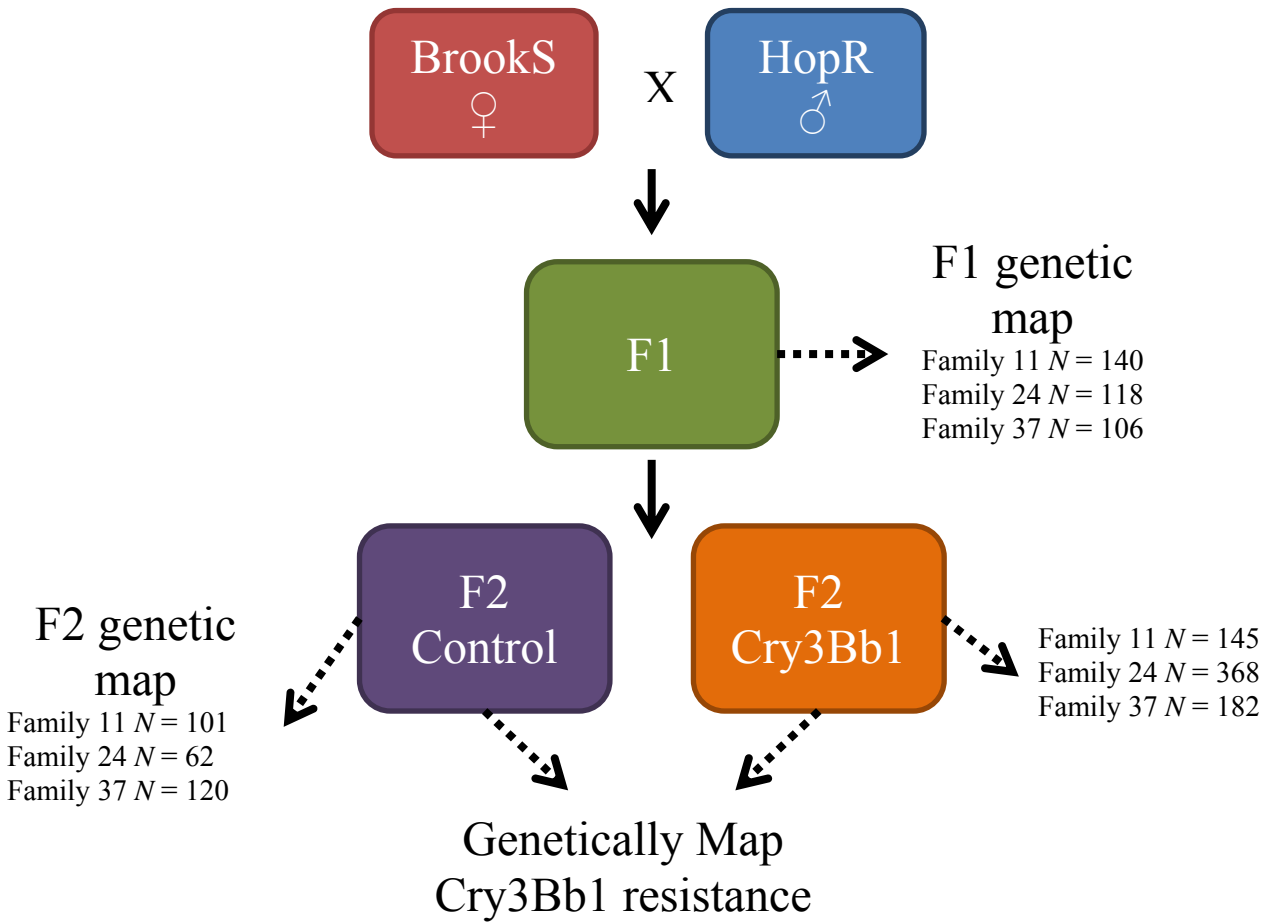

**Figure S1** Single-pair mating and mapping scheme used for all three Cry3Bb1 resistance mapping families.
