# Supplementary material for: Genetic Markers for Western Corn Rootworm Resistance to Bt Toxin
Source: PubMed Central journal article supplement (PMC4349093; doi:10.1534/g3.114.016485), 2015-01-07
Supplement: supp_g3.114.016485_FigureS2.pdf [file supp_g3.114.016485_FigureS2.pdf]

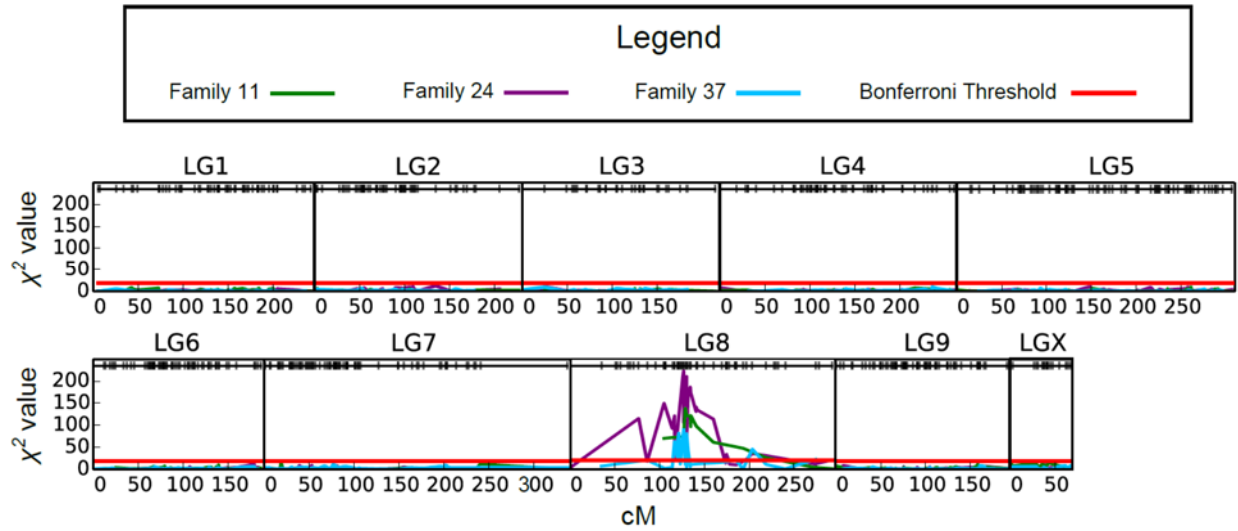

**Figure S2** Difference in genotype frequencies between treatment and control  $F_2$  populations for all 10 linkage groups as measured by the chi-squared statistic. The plot below gives a chi-squared test of independence between genotypic counts among treatment and control  $F_2$  survivors for all three families. In total 1,497 tests were performed, each with 2 degrees of freedom, resulting in a Bonferroni significance threshold of  $\chi^2 \geq 20.6$ . The genotyped marker positions are given at the top of each linkage group panel.
