# Supplementary material for: Genetic Markers for Western Corn Rootworm Resistance to Bt Toxin
Source: PubMed Central journal article supplement (PMC4349093; doi:10.1534/g3.114.016485), 2015-01-07
Supplement: supp_g3.114.016485_FigureS3.pdf [file supp_g3.114.016485_FigureS3.pdf]

A.

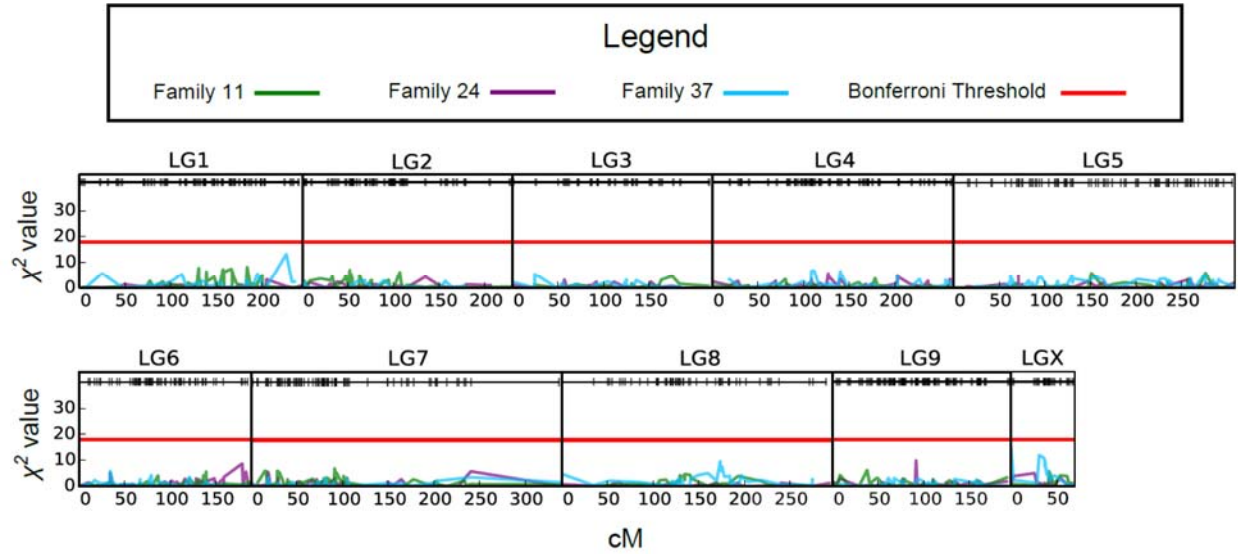

B.

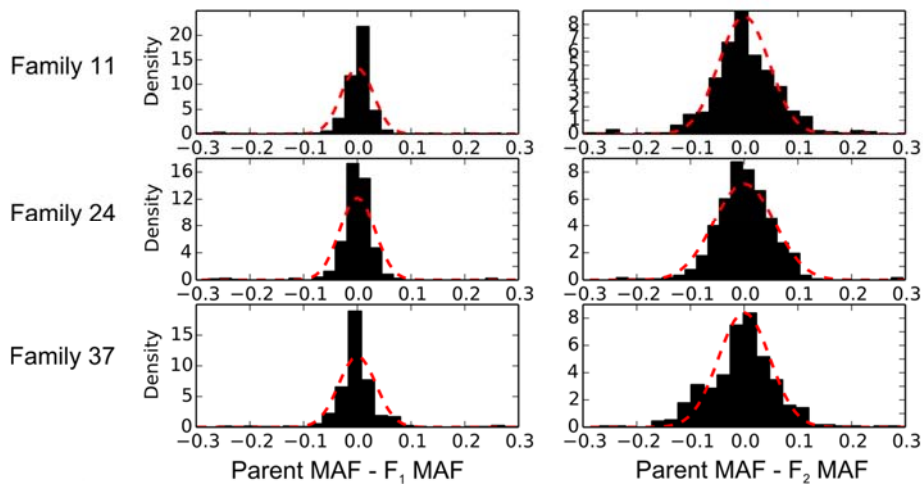

**Figure S3** Tests for segregation distortion among mapping families. **(A)** The genomic context of allele frequency segregation distortion between  $F_{1S}$  and the control  $F_{2S}$  across the 10 linkage groups as measured by the chi-squared statistic. 1,713 tests were run, each with 1 degree of freedom, resulting in a Bonferroni significance threshold of  $\chi^2 \geq 17.5$ . No markers show significant segregation distortion at this threshold. The genotyped marker positions are given at the top of each linkage group panel.

**(B)** Histograms of the deviation of the parental minor allele frequency (MAF) and the frequency of that same allele in the  $F_1$  and control  $F_2$  generations (black bars) for each of the three families and theoretical expectations based on random genetic drift (red dashed line). Allele frequency deviations are nearly symmetric and follow a distribution consistent with the expectation from random genetic drift.
