# Supplementary material for: Genetic Markers for Western Corn Rootworm Resistance to Bt Toxin
Source: PubMed Central journal article supplement (PMC4349093; doi:10.1534/g3.114.016485), 2015-01-07
Supplement: supp_g3.114.016485_FigureS4.pdf [file supp_g3.114.016485_FigureS4.pdf]

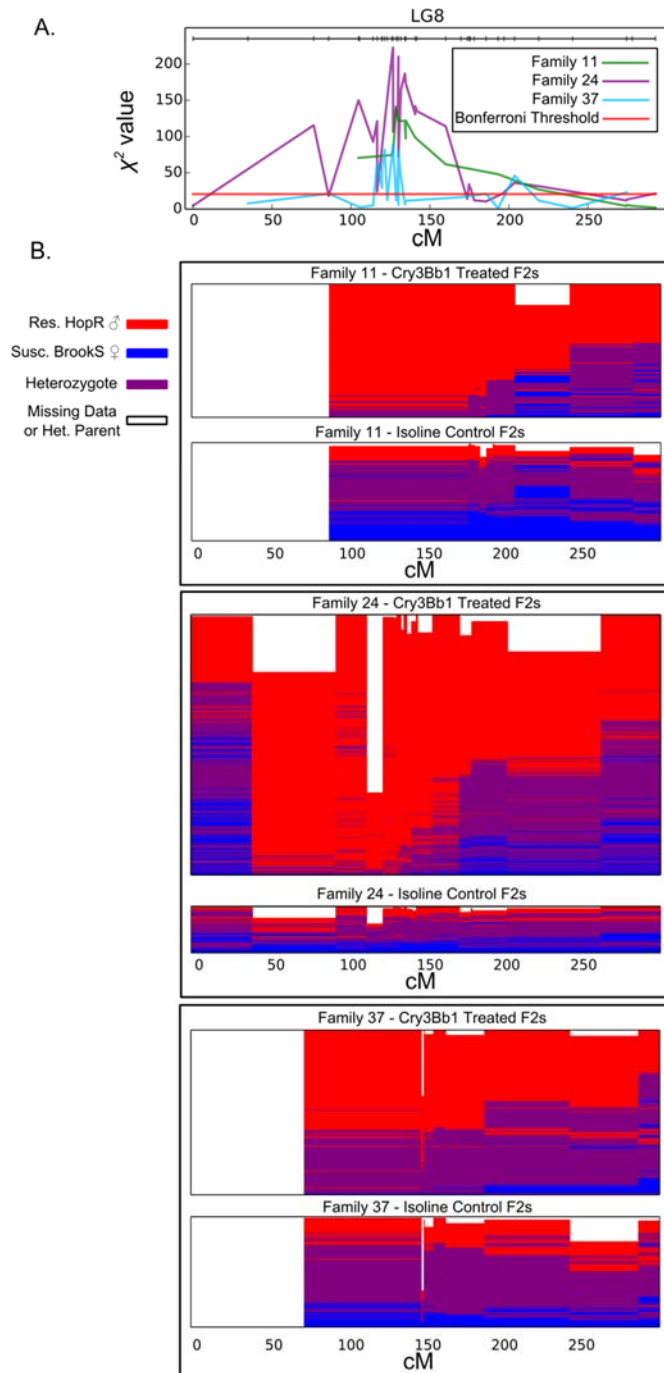

**Figure S4** Resistant parent haplotype enrichment among Cry3Bb1 treated F<sub>2</sub>s. **(A)** Map of resistance locus on LG8. **(B)** Enrichment of haplotypes contributed by Cry3Bb1 resistant parent in the resistance region on LG8 among F<sub>2</sub> survivors of Cry3Bb1. Each horizontal bar represent the genotype of a single F<sub>2</sub> individual. Only F<sub>2</sub>-informative markers are plotted to ensure correct haplotype phasing. Cry3Bb1 selected F<sub>2</sub>s show enrichment for the resistant parent haplotype (red), while all control F<sub>2</sub>s segregate near the expected 1:2:1 ratio among the resistant parent (red), heterozygote (purple), and susceptible parent (blue) genotypes. Data are missing for the left portion of Family 11 and 37 because the mapping parents lacked F<sub>2</sub>-informative markers in this region.
