# Supplementary material for: Genetic Markers for Western Corn Rootworm Resistance to Bt Toxin
Source: PubMed Central journal article supplement (PMC4349093; doi:10.1534/g3.114.016485), 2015-01-07
Supplement: supp_g3.114.016485_FigureS5.pdf [file supp_g3.114.016485_FigureS5.pdf]

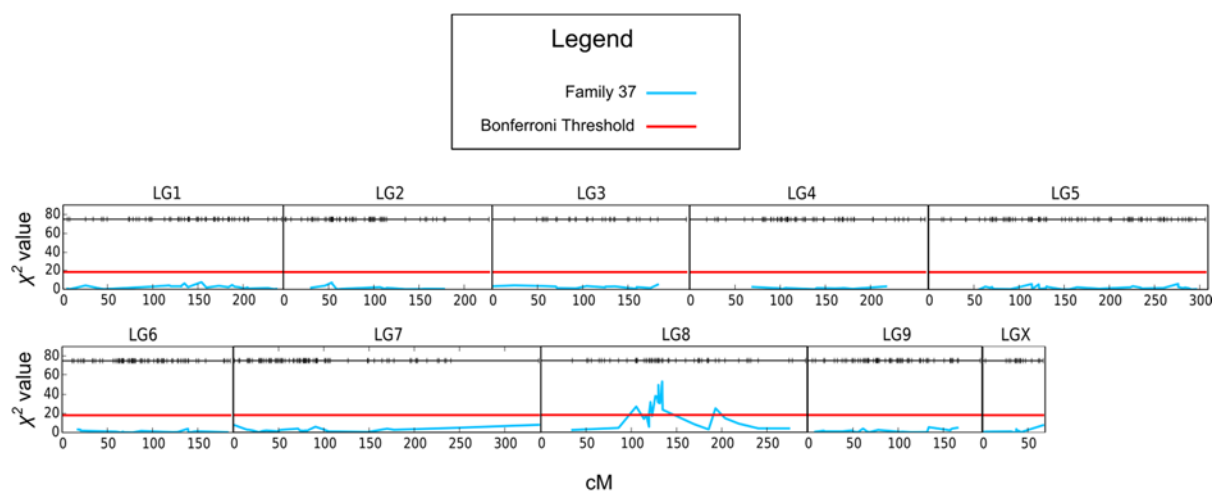

**Figure S5** To search for loci unlinked to the LG8 resistance locus that may influence resistance we focused on  $F_2$  survivors of the Cry3Bb1 treatment that were heterozygous in the resistance interval on LG8. Conditioning on these individuals as the treatment population, the plot below gives the difference in genotype frequencies between treatment and control  $F_2$  populations for all 10 linkage groups as measured by the chi-squared statistic. In total, 454 tests were performed, each with 2 degrees of freedom, resulting in a Bonferroni significance threshold of  $\chi^2 \geq 18.2$ . Only the LG8 resistance region is significant (due to the fact that the treatment population was completely heterozygous, while the control population contained resistant parent, heterozygote, and susceptible parent genotypes). The genotyped marker positions are given at the top of each linkage group panel.
